# Global disparities in SARS-CoV-2 genomic surveillance

**Authors:** Anderson F. Brito<sup>1\*</sup>; Elizaveta Semenova<sup>2</sup>; Gytis Dudas<sup>3</sup>; Gabriel W. Hassler<sup>4</sup>; Chaney C. Kalinich<sup>1,5</sup>; Moritz U.G. Kraemer<sup>6</sup>; Sarah C. Hill<sup>7</sup>; Danish Covid-19 Genome Consortium; Ester C. Sabino<sup>8</sup>; Oliver G. Pybus<sup>6,7</sup>; Christopher Dye<sup>6</sup>; Samir Bhatt<sup>9,10,11</sup>; Seth Flaxamn<sup>2</sup>; Marc A. Suchard<sup>12,13,14</sup>; Nathan D. Grubaugh<sup>1,15‡</sup>; Guy Baele<sup>16‡</sup>; Nuno R. Faria<sup>6,8,9,17‡</sup>

## Affiliations:

1. Department of Epidemiology of Microbial Diseases, Yale School of Public Health, New Haven, CT 06510, USA
2. Department of Mathematics, Imperial College London, London, UK
3. Gothenburg Global Biodiversity Centre, Gothenburg, Sweden
4. Department of Biomathematics, David Geffen School of Medicine, University of California Los Angeles, Los Angeles, CA, 90095, USA
5. Yale School of Medicine, Yale University, New Haven, CT
6. Department of Zoology, University of Oxford, Oxford OX1 3SZ, United Kingdom
7. Royal Veterinary College, Hawkshead, United Kingdom
8. Instituto de Medicina Tropical, Faculdade de Medicina da Universidade de São Paulo, São Paulo, Brazil.
9. MRC Centre for Global Infectious Disease Analysis, School of Public Health, Imperial College London, London, UK.
10. The Abdul Latif Jameel Institute for Disease and Emergency Analytics (J-IDEA), School of Public Health, Imperial College London, London, UK.
11. Section of Epidemiology, Department of Public Health, University of Copenhagen, Copenhagen, Denmark.
12. Department of Biomathematics, David Geffen School of Medicine, University of California Los Angeles, Los Angeles, CA, 90095, USA
13. Department of Biostatistics, Fielding School of Public Health, University of California Los Angeles, Los Angeles, CA, 90095, USA
14. Department of Human Genetics, David Geffen School of Medicine, University of California Los Angeles, Los Angeles, CA, 90095, USA
15. Department of Ecology and Evolutionary Biology, Yale University, New Haven, CT 06510, USA
16. Department of Microbiology, Immunology and Transplantation, Rega Institute, KU Leuven, Leuven, Belgium
17. The Abdul Latif Jameel Institute for Disease and Emergency Analytics (J-IDEA), School of Public Health, Imperial College London, London, UK.

\* Corresponding author: [andersonfbrito@gmail.com](mailto:andersonfbrito@gmail.com)

‡ Co-senior authors

## Abstract

The COVID-19 pandemic has revealed the importance of virus genome sequencing to guide public health interventions to control virus transmission and understand SARS-CoV-2 evolution. As of July 20th, 2021, >2 million SARS-CoV-2 genomes have been submitted to GISAID, 94% from high income and 6% from low and middle income countries. Here, we analyse the spatial and temporal heterogeneity in SARS-CoV-2 global genomic surveillance efforts. We report a comprehensive analysis of virus lineage diversity and genomic surveillance strategies adopted globally, and investigate their impact on the detection of known SARS-CoV-2 virus lineages and variants of concern. Our study provides a perspective on the global disparities surrounding SARS-CoV-2 genomic surveillance, their causes and consequences, and possible solutions to maximize the impact of pathogen genome sequencing for efforts on public health.

## One-Sentence Summary

NOTE: This preprint reports new research that has not been certified by peer review and should not be used to guide clinical practice.  
The causes, consequences and possible solutions for disparities in genomic surveillance observed in the COVID-19 pandemic.

## 53 **The importance of genomic surveillance**

54 RNA viruses accumulate genetic changes at high evolutionary rates, some of which allow adaptations  
55 to selective pressures induced by antivirals, vaccines, and host immunity (1). More than 20 months after  
56 the emergence of SARS-CoV-2, many countries continue to face large outbreaks of COVID-19 (2),  
57 recently driven by novel viral variants with constellations of amino acid changes, some acquired by  
58 convergent evolution (3). Variants of concern (VOCs) – such as Alpha/B.1.1.7; Beta/B.1.351;  
59 Gamma/P.1; and Delta/B.1.617.2 (and its descendent AY lineages) – have genotypic and phenotypic  
60 traits that pose increased risks to global public health, since they may affect diagnostics or therapeutics,  
61 confer higher transmissibility, lead to higher disease severity, and/or immune escape from natural  
62 infections and/or vaccines (4, 5). Variants of interest (VOI) – including Eta/B.1.525; Iota/B.1.526;  
63 Kappa/B.1.617.1 and; Lambda/C.37 – share some genetic traits with VOCs, but further evidence is  
64 needed to determine their risks to public health (6). To allow timely public health responses to emerging  
65 variants, it is essential to keep track of SARS-CoV-2 genetic diversity, preferably in real time (4, 7, 8).  
66 Following the evolution of VOCs/VOIs many countries have initiated or scaled up genomic surveillance,  
67 leading to an unprecedented number of viral genomes in publicly accessible databases, with >2,400,000  
68 consensus genome sequences deposited in GISAID (9), >916,000 high-throughput sequencing datasets  
69 and >969,500 consensus sequences in NCBI (10) as of July 20th, 2021. However, there are striking  
70 differences in the spatial and temporal intensity of genomic surveillance worldwide. Here we investigate  
71 global SARS-CoV-2 genomic surveillance during the first 15 months of COVID-19 pandemic, highlighting  
72 causes and consequences of surveillance disparities, and identifying key aspects for timely variant  
73 detection.

74  
75

## 76 **Global disparities in the genomic surveillance of SARS-CoV-2**

77 The impact and responses to control the COVID-19 pandemic differ greatly across geographic regions  
78 (11). In the early stages of the pandemic, high-income countries (HIC) relied on well-resourced  
79 laboratories to perform molecular testing and sequencing (12, 13), while low- and middle-income  
80 countries (LMIC) faced challenges in molecular diagnosis and SARS-CoV-2 sequencing (13–15). To  
81 investigate spatial and temporal heterogeneity in sequencing efforts, we analysed the percentage of  
82 COVID-19 cases that were sequenced from each country between February 2020 to March 2021 (**Fig.**  
83 **1A**). We observed that 100 out of 167 countries sequenced <0.5% of confirmed cases (**Fig. 1B**), and  
84 only 16 countries were able to sequence >5% of their overall confirmed cases. While HICs and LMICs  
85 reported similar numbers of cases (65.3 and 61.2 million, respectively), they respectively sequenced  
86 1.81% and 0.11% of their cases (**Table S1**). We found a moderate negative correlation between weekly  
87 sequencing percentages and reported COVID-19 incidence (cases/100K pop.,  $r^2 = -0.52$ ;  $p$ -value <  
88 0.001), suggesting that countries that kept incidence at low levels (**Fig. 1C**; **Fig. S1**) generally had the  
89 means or opportunity to sequence a high proportion of cases, as observed in Hong Kong (12%), Taiwan  
90 (12%), New Zealand (38%), Australia (59%) and Iceland (73% sequenced cases). Only 20 out of 167  
91 countries included in this study were able to sequence more than 5% in weeks where COVID-19  
92 incidence was high (>100 cases per 100,000 pop.), mainly high-income countries in Northern Europe,  
93 Western Europe, and Southern Europe (**Fig. 1**; **Fig. S1**). For example, despite facing high weekly  
94 COVID-19 incidence after October 2020, Denmark and the UK were still able to keep their sequencing  
95 efforts above 10% in most weeks, and attain an overall proportion of 32% and 8% sequenced cases,  
96 respectively (**Fig. 1A-B**; **Fig. S1**).

97

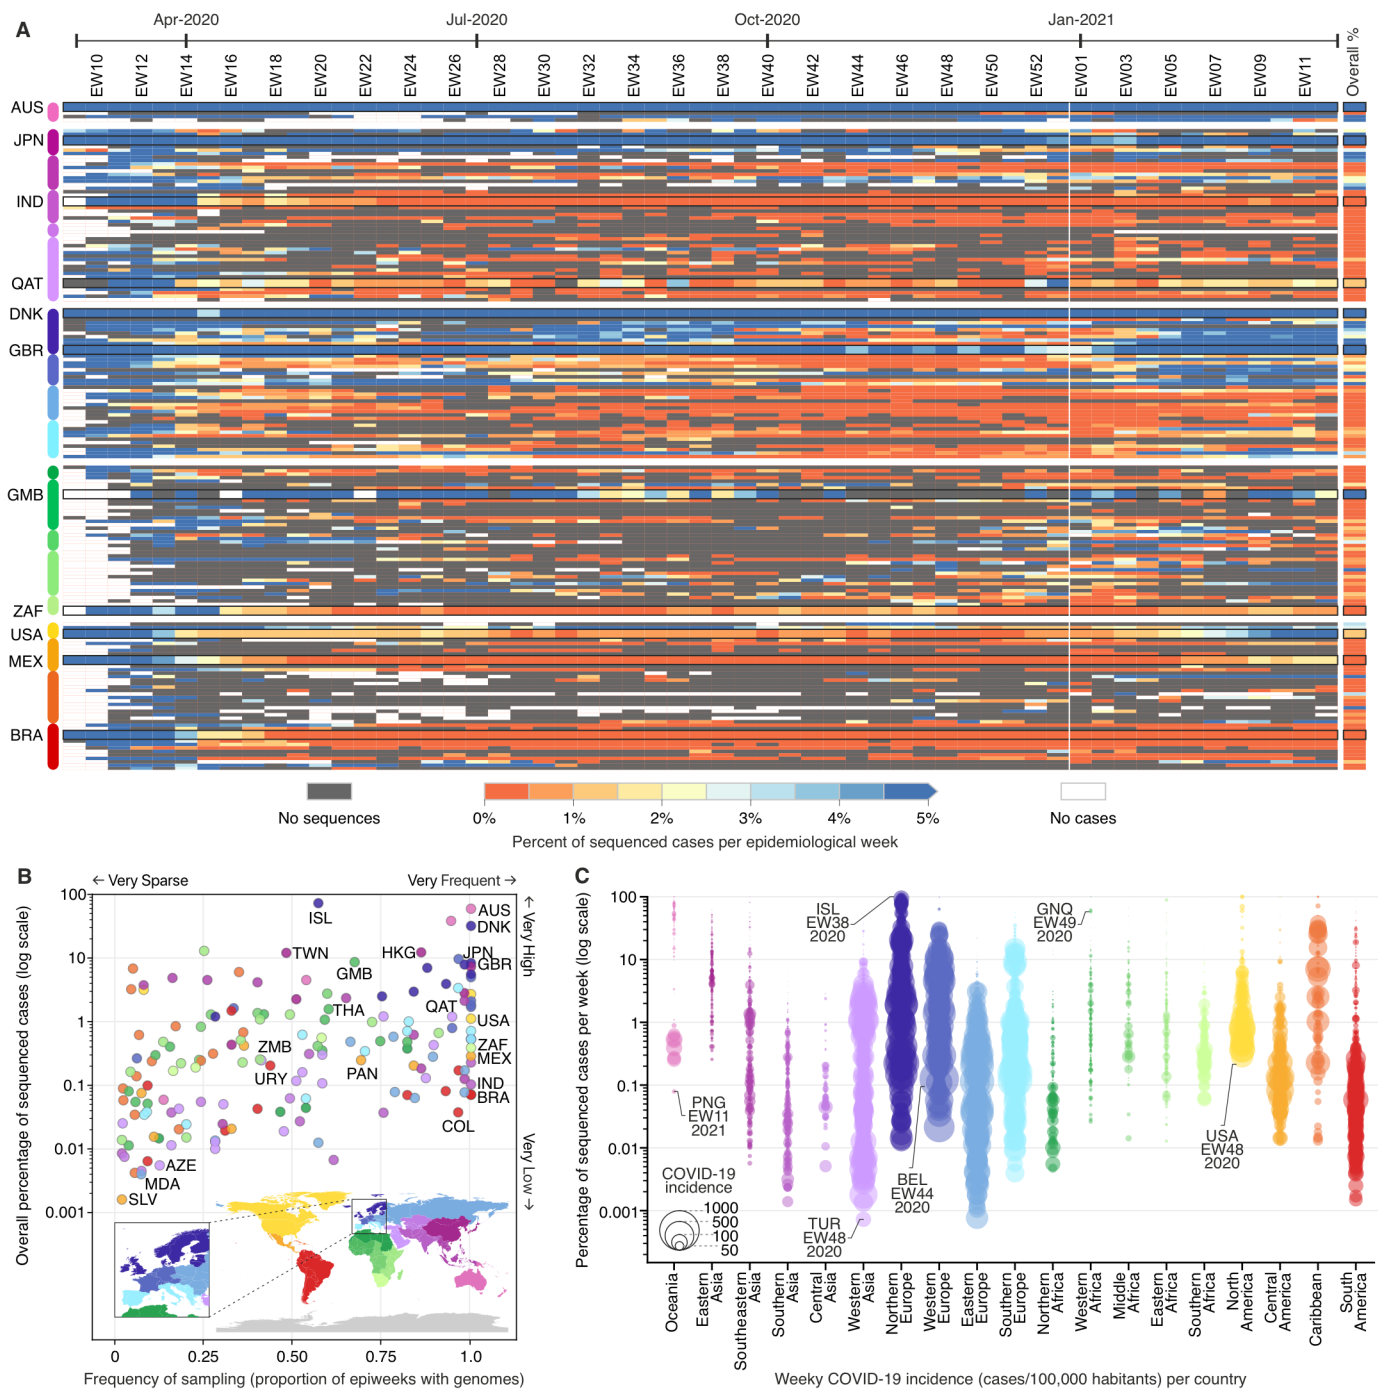

98  
99  
100  
101  
102  
103  
104  
105  
106  
107  
108  
109  
110  
111  
112  
113  
114  
115

**Figure 1. Disparities in genomic surveillance worldwide.** (A) Percentage of sequenced COVID-19 cases per country per epidemiological week (EW), between February 23rd, 2020 and March 27th, 2021 (based on metadata submitted to GISAID up to May 30th, 2021). (B) Frequency and overall percentage of sequenced cases per country. This plot summarizes the data shown in (A), where the x-axis shows the percentage of epidemiological weeks with sequenced cases, and the y-axis displays the overall percentage of cases shown in the rightmost column of panel (A). (C) Percentage of cases sequenced per EW per country, per geographic region. Each circle represents an epidemiological week with at least one sequenced case, and their diameters highlight the incidence (cases per 100,000 habitants) in each country (e.g. “ISL-EW38-2020” shows data from week 38 in 2020, in Iceland). Country codes (ISO 3166-1): AUS = Australia; AZE = Azerbaijan; BEL = Belgium; BRA = Brazil; COL = Colombia; DNK = Denmark; GBR = United Kingdom; GMB = Gambia; GNQ = Equatorial Guinea; HKG = Hong Kong; IND = India; ISL = Iceland; JPN = Japan; MDA = Moldova; MEX = Mexico; PAN = Panama; PNG = Papua New Guinea; QAT = Qatar; SLV = El Salvador; THA = Thailand; TUR = Turkey; TWN = Taiwan; URY = Uruguay; USA = United States; ZAF = South Africa; and ZMB = Zambia.

116  
117  
118  
119  
120  
121  
122  
123  
124  
125  
126  
127  
128  
129  
130  
131  
132  
133  
134  
135  
136  
137  
138  
139  
140  
141  
142  
143  
144  
145  
146  
147  
148  
149  
150  
151  
152  
153  
154  
155  
156  
157  
158  
159  
160  
161  
162  
163  
164

Many LMICs or countries with low levels of country-wide genomic surveillance were only able to sequence >5% when weekly incidence was low (<10 cases/100,000 pop.). For example, Gambia, which reported a low cumulative incidence of 226 cases/100,000 pop., sequenced nearly 8% of all cases up to mid-March 2021 (**Fig. 1**)(16). However, most countries in Africa and Asia, despite experiencing low incidences, were not able to scale up genomic surveillance like Gambia, Japan, Hong Kong, New Zealand and Australia, which experienced similar COVID-19 incidences (**Fig. 1B-C**; **Fig. S1**). In most Latin American countries, sequencing >1% of cases has proven to be a difficult task, particularly during periods of high incidence. Despite the low percentages of sequenced cases, surveillance in Latin America has been consistent, with heavily affected countries such as Brazil, Mexico, Chile, Colombia and Peru generating genomes nearly every week (**Fig. 1B-C**). This suggests that sequencing high or even moderate percentages of cases (0.1% to 1%) each week is still not feasible for most LMICs. Our study reveals another concerning fact: more than 20 LMICs, especially in Africa, do not have openly available genomes, or are only represented in the global genomic surveillance due to cases associated with travel from those locations being sequenced abroad (**Fig. S2**). Overall, these results show that with the worsening of the pandemic, few countries were able to maintain thorough genomic surveillance, especially LMICs, who generated few (red shades in **Fig. 1A**) or no sequences (dark grey) for many weeks (**Table S2**). European countries constitute exceptions, sequencing high or very high percentages of cases, nearly on a weekly basis (**Fig. 1**; **Fig. S2**).

### Sequencing regularity and turnaround time

The rapid public sharing of data is essential for genomic surveillance (17). In 2020, the turnaround time between sample collection and genome submission varied greatly across geographic regions (**Fig. 3**; **Fig. S3**; see also (18)). Some countries have been performing surveillance mainly in near real-time, with a median turnaround time below 21 days (**Fig. S3**), as observed in Northern Europe (median turnaround time = 19 days). When cases started to rise in the second wave in Europe, in October 2020, countries in the region began to focus on sequencing more recent cases, shortening the median time from 43 to 19 days (see last epidemiological weeks in Northern Europe, **Fig. 2**). This marked change in early October coincides with, and could have happened in response to, the emergence and spread of B.1.1.7 (23). Similar trends were also observed in other regions, likely in an attempt to capture early introductions of B.1.1.7 (24).

Much longer turnaround times were observed in countries in eastern and central Africa, where sequencing was mainly retrospective (median turnaround time = 78 days, **Fig. S2**). Longer turnaround times could be a result of sequencing projects to investigate reinfections (19), vaccine escape (20), or to understand past epidemic dynamics (21, 22), types of research that are slower than public health surveillance. But longer turnaround times in a context of surveillance can be caused by delays in tasks that go from 'sample to sequence' and/or from 'sequence to database'. Delays from 'sample to sequence' may occur as a result of insufficient lab personnel, delays in shipment of samples and reagents, and as a result of poor coordination, which leads to missing or incomplete metadata connected to samples, such as date and location of collection (7, 14, 15, 25, 26). Likewise, the lack of experienced professionals to quickly and accurately perform bioinformatics tasks (genome assembly, data collation and submission, etc) may extend the 'sequence to database' phase, and hamper timely responses (25). Delays may also come from concerns of having findings scooped and published by other researchers (27), revealing that the matter of data ownership, including genomic data, should be resolved in consultations with data providers, database managers, and publishers, to properly acknowledge these efforts, and facilitate rapid data sharing for the benefit of public health (7, 27, 28).

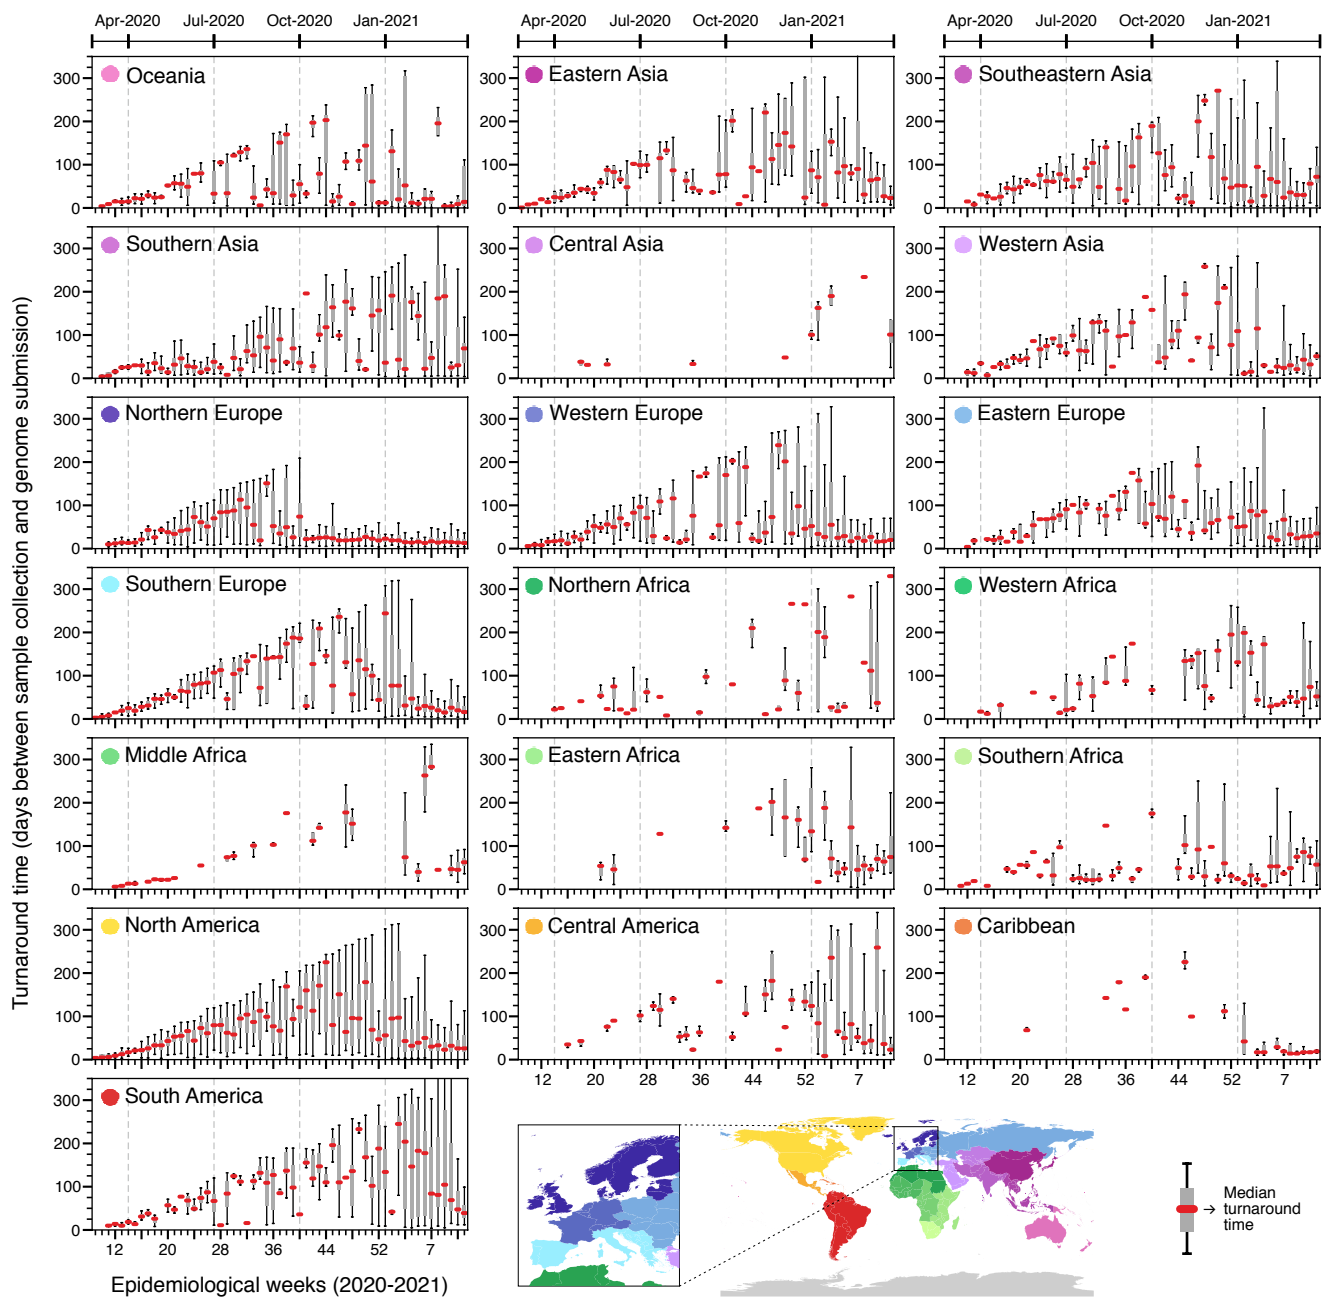

165  
166  
167  
168  
169  
170  
171  
172

**Figure 2. Turnaround time across geographic regions.** Delays between sample collection and genome submission across epidemiological weeks (turnaround time) in different regions, between February 23rd, 2020 and March 27th, 2021, based on metadata submitted to GISAID up to May 30th, 2021.

173 **Factors associated with genomic surveillance capacity**

174 Disparities in national wealth, in investment in research and development (R&D), and in the extent of  
175 national coordinated sequencing efforts impact the ability of countries to perform genomic surveillance  
176 (7, 13, 26). To investigate the impact of socioeconomic factors on SARS-CoV-2 genomic surveillance  
177 preparedness around the world, we explored how a list of country-level covariates are correlated with  
178 the percentage of sequenced COVID-19 cases in each country (**Table S2**). The strongest correlations  
179 with the log<sub>10</sub>-transformed percentage of sequenced cases are shown by expenditure on R&D per capita  
180 ( $r^2 = 0.47$ ), GDP per capita (0.37), socio-demographic index (0.31), established influenza genomic  
181 surveillance capacity (0.30) and fraction of out-of-pocket health expenditure out of total health  
182 expenditure (-0.35) (**Fig. 3, Table S2**). Using the same set of covariates, we also explored their  
183 correlations with the log-transformed mean turnaround time (**Supplementary Table S3**). The strongest  
184 correlations of the log-transformed mean turnaround time are with universal health coverage ( $r^2 = -0.45$ ),  
185 healthcare access and quality index (-0.44), socio-demographic index (-0.42) and health expenditure per  
186 capita (-0.4) (**Fig. S4, Table S3**).

187 These results reveal that socioeconomic factors represent important obstacles. Efforts must be made to  
188 improve the genomic capacity in LMIC countries to prevent the unnoticed emergence and spread of  
189 variants (13). To start, diagnostic capacity needs to be enhanced, as case underreporting directly  
190 impacts the ability of countries to detect variants and their frequency changes.

191  
192  
193  
194

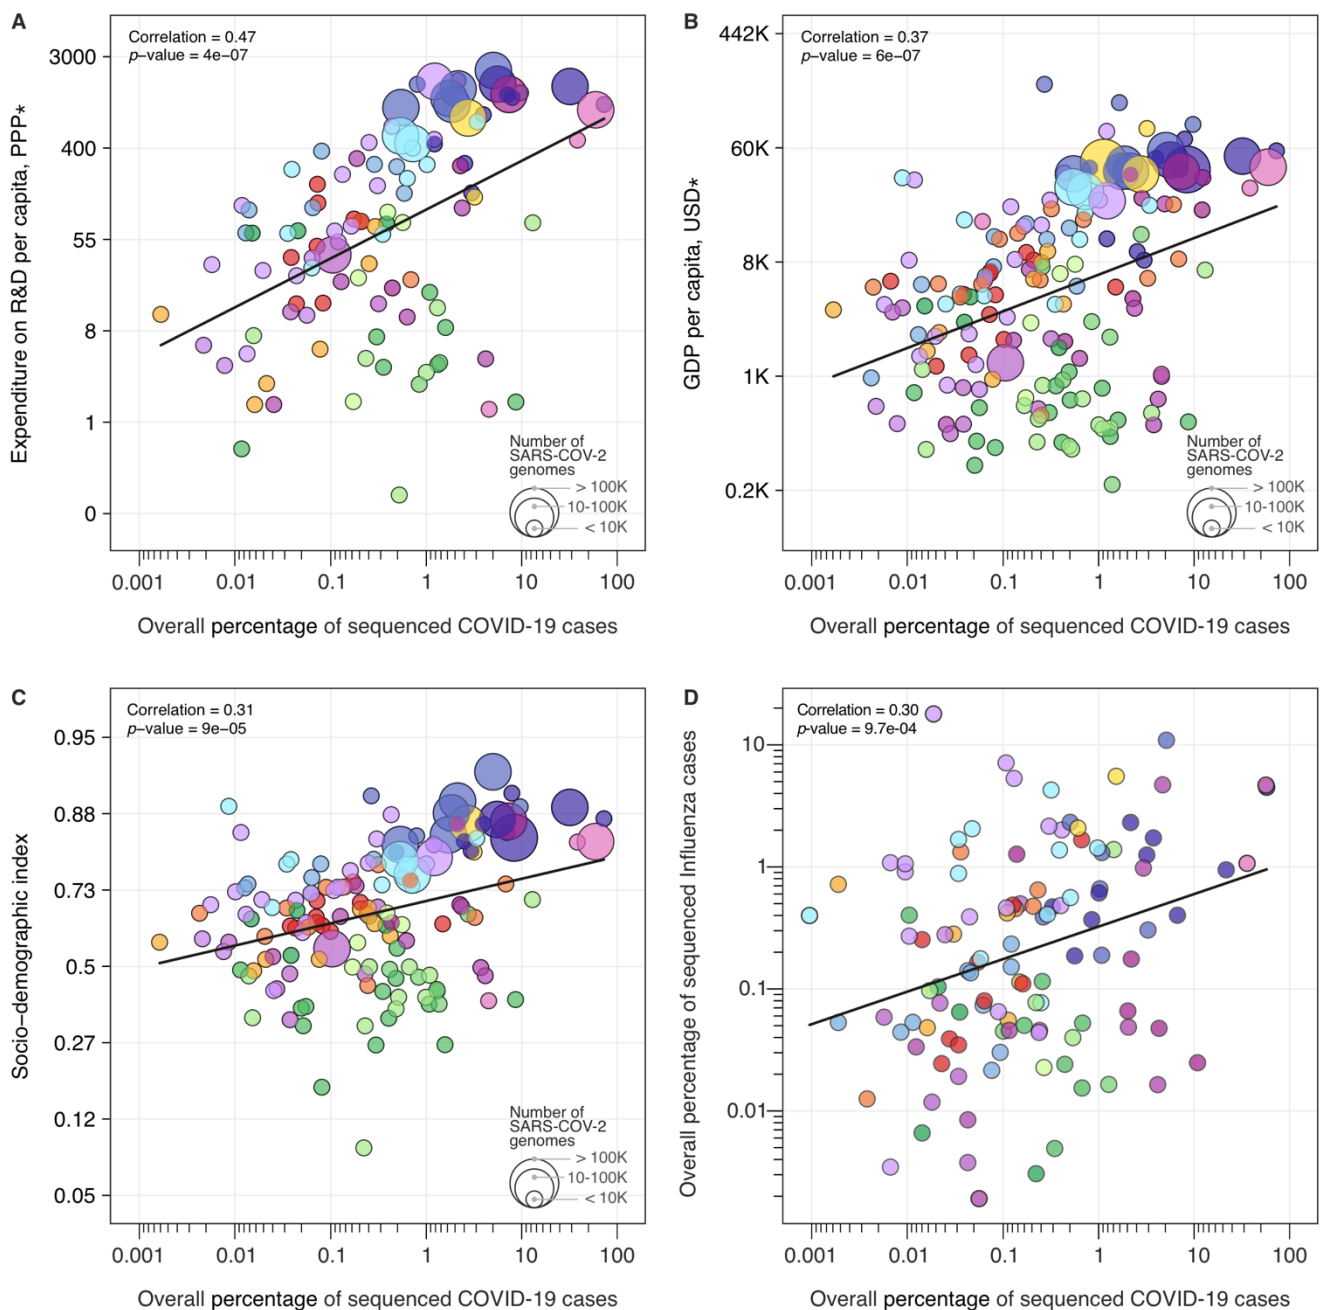

195  
 196 **Figure 3. Case sequencing percentages and socioeconomic covariates.** Covariates that show the  
 197 highest correlation with the overall percentage of COVID-19 sequenced cases (along the period shown  
 198 in Fig. 1A). (A) Expenditure on R&D per capita; (B) GDP per capita; (C) Socio-demographic index; (D)  
 199 Overall percentage of Influenza sequenced cases in 2019 (HA segment). The colour scheme of  
 200 geographic regions is the same as in Figures 1 and 2. Solid line shows the linear fit. \*PPP = purchasing  
 201 power parity, USD = US dollar 2005.

202  
 203  
 204  
 205

## 206 **Sampling strategies for rapid variant detection**

207 Since the initial detection and emergence of the VOC B.1.1.7/Alpha in the UK, countries across the world  
208 have sought to intensify genomic surveillance. As shown above, genomic surveillance is mainly  
209 characterized by three key aspects towards detecting previously-identified variants in a timely manner:  
210 the percentage of sequenced cases (**Fig. 1**), the frequency of genome sampling (**Fig. 1B and Fig. 2**),  
211 and the turnaround time (**Fig. 2**). Since resources are limited and socioeconomic factors affect the ability  
212 of countries to perform surveillance (**Fig. 3 and Fig. S4**), in a quantitative manner we evaluated how  
213 sequencing percentage and turnaround time affects a country's ability to detect a previously-identified  
214 variant (**Fig. 4**). Initially, by exploring the diversity of lineages detected by each country in 2020-2021,  
215 we found that sequencing high percentages of cases may not necessarily lead to detection of more viral  
216 lineages (**Fig. 4A-D, Fig. S5**). High numbers of infections may favour the emergence of new variants  
217 (29), and with high global connectivity, some countries are more likely to import new lineages from  
218 abroad (24, 30, 31), factors that explain differences in viral lineage diversity detected in the countries.  
219 However, as expected, countries sequencing low percentages of cases and few genomes tend to detect  
220 less lineage diversity (**Fig. S6 and S7**). We also estimated the probability of first detection of previously  
221 identified lineages (across all lineages), under different combinations of turnaround time and sequencing  
222 percentages, assuming a scenario of random and uniform sampling at national level. To begin, we looked  
223 at the landscape of detection using binomial confidence intervals, to specifically highlight what  
224 combinations of 'number of cases' and 'sequencing percentages' can confidently say that a lineage not  
225 encountered in sequence data is also not very common. As an example, this approach allowed us to  
226 infer that when the prevalence of a rare lineage is 2%, a surveillance program would need to sequence  
227 300 representative cases to detect at least one genome of that lineage with 95% probability (**Fig. 4E**).  
228 On a different look at the empirical data (**Fig. 4F**), we evaluated how different sequencing efforts are  
229 able to detect a lineage before it reaches 100 cases, and our analysis revealed that the percentage of  
230 sequenced cases have a larger role than turnaround time. By looking at this effect over time (**Fig. 4G-**  
231 **K**), we found that sequencing higher percentages of cases enable rapid detection of lineages, even with  
232 turnaround time delays.

233 To track a virus such as SARS-CoV-2, which accumulates 2-3 substitutions per month, sampling on a  
234 weekly basis is recommended (32). Throughout this pandemic, despite differences in diagnostic  
235 capacity, weekly incidences as high as 100 cases/100,000 pop. were reported in many countries (Fig.  
236 1C; Fig. S1). Considering the findings presented above, it is important that local public health labs  
237 improve their capacity to be able to sequence at least 0.5% of the cases during peak incidence, always  
238 adopting strategies to obtain random and representative sampling (in terms of age, sex, clinical  
239 spectrum, and geographical distribution) (33). For example, if a location (country, state, city) with 10  
240 million habitants is reporting a weekly incidence of 100 cases/100,000 pop., a 0.5% threshold could be  
241 achieved by sequencing 1 genome for every 200,000 habitants, which we propose as a reasonable  
242 benchmark. Based on empirical data (Fig. 1; Fig. S1) and our statistical analysis (Fig. 4E-K), if public  
243 health labs worldwide use such a benchmark to set their minimal operational limits to sequence at least  
244 0.5% of the cases at high incidence (100 cases/100,000 pop.), with quick turnaround time (<21 days), it  
245 would greatly improve our global capacity to detect new variants and track changes in variant prevalence.

246  
247  
248  
249  
250



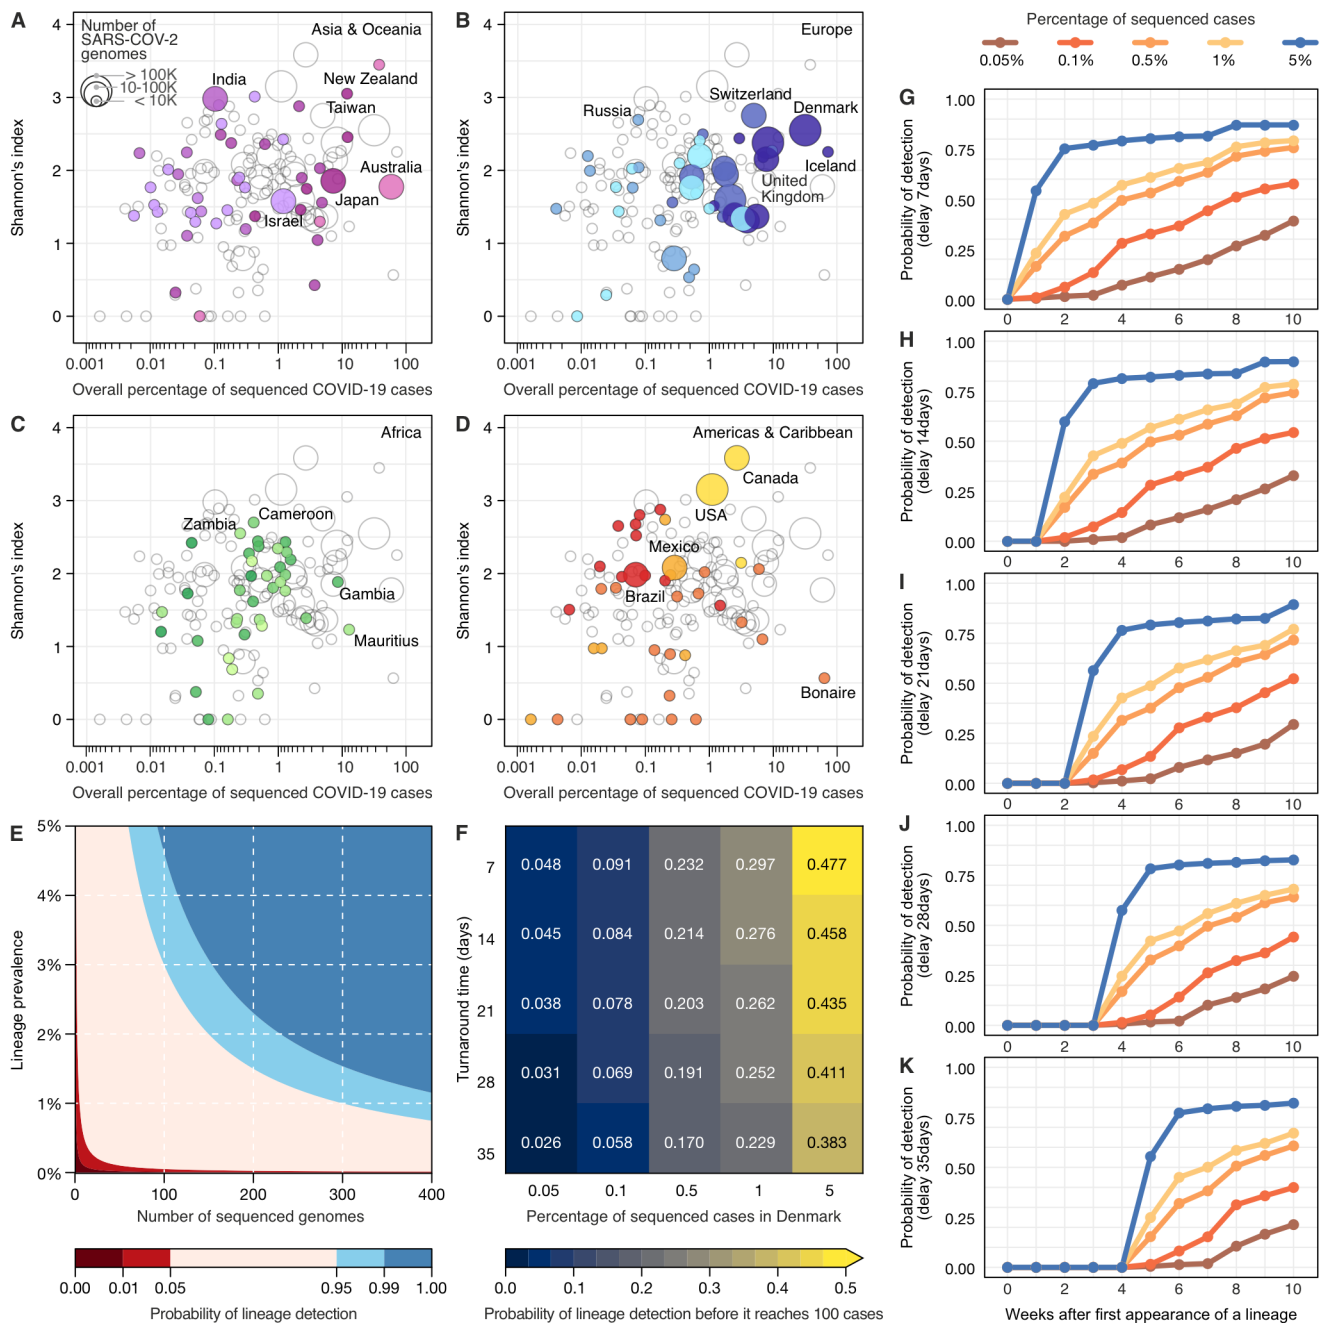

251  
 252 **Figure 4. Detection of SARS-CoV-2 lineages under distinct scenarios of genomic surveillance.** (A-  
 253 D) *Shannon index* of lineage diversity reported in each country adopting different sequencing efforts.  
 254 The colour scheme of geographic regions is the same used in Figures 1, 2 and 3. (E) The probability of  
 255 detecting at least one genome of a rare lineage under different sequencing regimes. (F) Relative  
 256 importance of decreasing genome sequencing turnaround time versus increasing sequencing  
 257 percentage measured as probability that a lineage found in simulated datasets was detected before it  
 258 had reached 100 cases in the ground truth dataset (described in Fig. S8). (G-K) Probability of lineage  
 259 detection considering delays of 7, 14, 21, 28 and 35 days between sample collection and genome  
 260 submission (turnaround time).  
 261  
 262  
 263  
 264  
 265  
 266  
 267

268

## 269 **Conclusion**

270 We provide a comprehensive overview of SARS-CoV-2 genomic surveillance patterns observed  
271 worldwide, highlighting disparities in surveillance capacity in different geographic regions, in terms of  
272 percentage of sequenced cases, frequency of sampling (**Fig. 1**), and turnaround time (**Fig. 2**).  
273 Differences in socioeconomic (**Fig. 3**), epidemiological (**Fig. S1**), and political factors (26) are associated  
274 with genomic surveillance capacity and timeliness. Consequently genomic surveillance in most countries  
275 can not provide rapid responses (quick turnaround, below 21 days), perform mainly sparse surveillance  
276 (less than 75% of the weeks are sampled), and are unable to achieve even the minimum percentage of  
277 sequenced cases we propose here as a benchmark (at least 0.5% of reported cases in high incidence  
278 weeks). Infectious diseases represent a global threat, and as such, require international, coordinated  
279 efforts to allow the rapid detection of emerging pathogens (4, 26). Since the identification of cases is an  
280 essential step that enables genomic surveillance, it is essential to enhance diagnostic capacity within  
281 countries, beyond the metropolitan areas. Further, in order to maintain constant and rapid genome  
282 sequencing, local coordination, adequate staffing and training, and appropriate analytical tools are  
283 essential for enabling rapid responses to emerging infectious disease threats to public health. To that  
284 end, we need to implement better protocols for performing representative sampling (see 28, 33), so that  
285 affordable, impactful and cost-effective genomic surveillance strategies can be adopted. Finally, efforts  
286 must be made to provide funds, training, and logistic support for LMICs to improve their local genomic  
287 surveillance capacity, to allow public health decision making in regions where resources may be scarce.

288

289

290

## 291 References

- 292 1. J. L. Geoghegan, E. C. Holmes, The phylogenomics of evolving virus virulence. *Nat. Rev. Genet.*  
293 **19**, 756–769 (2018).
- 294 2. WHO. *WHO COVID-19 Explorer* (2021), (available at <https://worldhealthorg.shinyapps.io/covid/>).
- 295 3. A. S. Luring, E. B. Hodcroft, Genetic Variants of SARS-CoV-2—What Do They Mean? *JAMA.*  
296 **325**, 529–531 (2021).
- 297 4. The Lancet, Genomic sequencing in pandemics. *Lancet.* **397**, 445 (2021).
- 298 5. CDC, Cases, Data, and Surveillance (2021), (available at <https://www.cdc.gov/coronavirus/2019-ncov/cases-updates/variant-surveillance/variant-info.html>).
- 299
- 300 6. WHO, Tracking SARS-CoV-2 variants. *WHO* (2021), (available at  
301 <https://www.who.int/en/activities/tracking-SARS-CoV-2-variants/>).
- 302 7. S. C. Inzaule, S. K. Tessema, Y. Kebede, A. E. Ogwel Ouma, J. N. Nkengasong, Genomic-  
303 informed pathogen surveillance in Africa: opportunities and challenges. *Lancet Infect. Dis.* (2021),  
304 doi:10.1016/S1473-3099(20)30939-7.
- 305 8. N. D. Grubaugh, E. B. Hodcroft, J. R. Fauver, A. L. Phelan, M. Cevik, Public health actions to  
306 control new SARS-CoV-2 variants. *Cell.* **184**, 1127–1132 (2021).
- 307 9. GISAID. *GISAID* (2021), (available at <https://www.gisaid.org/>).
- 308 10. NCBI. *NCBI SARS-CoV-2 Resources* (2021), (available at <https://www.ncbi.nlm.nih.gov/sars-cov-2/>).
- 309
- 310 11. T. Hale, N. Angrist, R. Goldszmidt, B. Kira, A. Petherick, T. Phillips, S. Webster, E. Cameron-  
311 Blake, L. Hallas, S. Majumdar, H. Tatlow, A global panel database of pandemic policies (Oxford  
312 COVID-19 Government Response Tracker). *Nat Hum Behav.* **5**, 529–538 (2021).
- 313 12. D. Cyranoski, Alarming COVID variants show vital role of genomic surveillance. *Nature.* **589**, 337–  
314 338 (2021).
- 315 13. M. Wadman, Blind spots thwart global coronavirus tracking. *Science.* **372**, 773–774 (2021).
- 316 14. M. A. Benítez, C. Velasco, A. R. Sequeira, J. Henríquez, F. M. Menezes, F. Paolucci, Responses  
317 to COVID-19 in five Latin American countries. *Health Policy Technol.* **9**, 525–559 (2020).
- 318 15. Y. A. Adebisi, G. I. Oke, P. S. Ademola, I. G. Chinemelum, I. O. Ogunkola, D. E. Lucero-Prisno Iii,  
319 SARS-CoV-2 diagnostic testing in Africa: needs and challenges. *Pan Afr. Med. J.* **35**, 4 (2020).
- 320 16. MRC, Research training and career development - MRC Unit The Gambia at LSHTM. *MRC*  
321 (2017), (available at <https://www.mrc.gm/research-training-career-development/>).
- 322 17. T. R. Frieden, C. T. Lee, A. F. Bochner, M. Buissonnière, A. McClelland, 7-1-7: an organising  
323 principle, target, and accountability metric to make the world safer from pandemics. *Lancet.* **398**,  
324 638–640 (2021).
- 325 18. K. Kalia, G. Saberwal, G. Sharma, The lag in SARS-CoV-2 genome submissions to GISAID. *Nat.*  
326 *Biotechnol.* (2021), doi:10.1038/s41587-021-01040-0.
- 327 19. J. Wang, C. Kaperak, T. Sato, A. Sakuraba, COVID-19 reinfection: a rapid systematic review of  
328 case reports and case series. *J. Invest. Med.* **69**, 1253–1255 (2021).
- 329 20. T. Kustin, N. Harel, U. Finkel, S. Perchik, S. Harari, M. Tahor, I. Caspi, R. Levy, M. Leshchinsky,  
330 S. Ken Dror, G. Bergerzon, H. Gadban, F. Gadban, E. Eliassian, O. Shimron, L. Saleh, H. Ben-Zvi,  
331 E. Keren Taraday, D. Amichay, A. Ben-Dor, D. Sagas, M. Strauss, Y. Shemer Avni, A. Huppert, E.

- 332 Kepten, R. D. Balicer, D. Netzer, S. Ben-Shachar, A. Stern, Evidence for increased breakthrough  
333 rates of SARS-CoV-2 variants of concern in BNT162b2-mRNA-vaccinated individuals. *Nat. Med.*  
334 (2021), doi:10.1038/s41591-021-01413-7.
- 335 21. C. Alteri, V. Cento, A. Piralla, V. Costabile, M. Tallarita, L. Colagrossi, S. Renica, F. Giardina, F.  
336 Novazzi, S. Gaiarsa, E. Matarazzo, M. Antonello, C. Vismara, R. Fumagalli, O. M. Epis, M. Puoti,  
337 C. F. Perno, F. Baldanti, Genomic epidemiology of SARS-CoV-2 reveals multiple lineages and  
338 early spread of SARS-CoV-2 infections in Lombardy, Italy. *Nat. Commun.* **12**, 434 (2021).
- 339 22. B. B. Oude Munnink, D. F. Nieuwenhuijse, M. Stein, Á. O'Toole, M. Haverkate, M. Mollers, S. K.  
340 Kamga, C. Schapendonk, M. Pronk, P. Lexmond, A. van der Linden, T. Bestebroer, I. Chestakova,  
341 R. J. Overmars, S. van Nieuwkoop, R. Molenkamp, A. A. van der Eijk, C. GeurtsvanKessel, H.  
342 Vennema, A. Meijer, A. Rambaut, J. van Dissel, R. S. Sikkema, A. Timen, M. Koopmans, Dutch-  
343 Covid-19 response team, Rapid SARS-CoV-2 whole-genome sequencing and analysis for  
344 informed public health decision-making in the Netherlands. *Nat. Med.* **26**, 1405–1410 (2020).
- 345 23. A. Rambaut, N. Loman, O. Pybus, W. Barclay, J. Barrett, A. Carabelli, T. Connor, T. Peacock, D.  
346 L. Robertson, E. Volz, Preliminary genomic characterisation of an emergent SARS-CoV-2 lineage  
347 in the UK defined by a novel set of spike mutations (2020), (available at  
348 [https://virological.org/t/preliminary-genomic-characterisation-of-an-emergent-sars-cov-2-lineage-in-](https://virological.org/t/preliminary-genomic-characterisation-of-an-emergent-sars-cov-2-lineage-in-the-uk-defined-by-a-novel-set-of-spike-mutations/563)  
349 [the-uk-defined-by-a-novel-set-of-spike-mutations/563](https://virological.org/t/preliminary-genomic-characterisation-of-an-emergent-sars-cov-2-lineage-in-the-uk-defined-by-a-novel-set-of-spike-mutations/563)).
- 350 24. T. Alpert, A. F. Brito, E. Lasek-Nesselquist, J. Rothman, A. L. Valesano, M. J. MacKay, M. E.  
351 Petrone, M. I. Breban, A. E. Watkins, C. B. F. Vogels, C. C. Kalinich, S. Dellicour, A. Russell, J. P.  
352 Kelly, M. Shudt, J. Plitnick, E. Schneider, W. J. Fitzsimmons, G. Khullar, J. Metti, J. T. Dudley, M.  
353 Nash, N. Beaubier, J. Wang, C. Liu, P. Hui, A. Muyombwe, R. Downing, J. Razeq, S. M. Bart, A.  
354 Grills, S. M. Morrison, S. Murphy, C. Neal, E. Laszlo, H. Rennert, M. Cushing, L. Westblade, P.  
355 Velu, A. Craney, L. Cong, D. R. Peaper, M. L. Landry, P. W. Cook, J. R. Fauver, C. E. Mason, A.  
356 S. Luring, K. St George, D. R. MacCannell, N. D. Grubaugh, Early introductions and transmission  
357 of SARS-CoV-2 variant B.1.1.7 in the United States. *Cell* (2021), doi:10.1016/j.cell.2021.03.061.
- 358 25. A. Maxmen, Why US coronavirus tracking can't keep up with concerning variants. *Nature*. **592**,  
359 336–337 (2021).
- 360 26. S. J. Becker, J. Taylor, J. M. Sharfstein, Identifying and tracking SARS-CoV-2 variants - A  
361 challenge and an opportunity. *N. Engl. J. Med.* **385**, 389–391 (2021).
- 362 27. A. Maxmen, Why some researchers oppose unrestricted sharing of coronavirus data. *Nature*  
363 (2021), doi:10.1038/d41586-021-01194-6.
- 364 28. WHO, Genomic sequencing of SARS-CoV-2: a guide to implementation for maximum impact on  
365 public health (2021), (available at  
366 <https://apps.who.int/iris/bitstream/handle/10665/338480/9789240018440-eng.pdf>).
- 367 29. N. D. Grubaugh, M. E. Petrone, E. C. Holmes, We shouldn't worry when a virus mutates during  
368 disease outbreaks. *Nat Microbiol.* **5**, 529–530 (2020).
- 369 30. J. R. Fauver, M. E. Petrone, E. B. Hodcroft, K. Shioda, H. Y. Ehrlich, A. G. Watts, C. B. F. Vogels,  
370 A. F. Brito, T. Alpert, A. Muyombwe, J. Razeq, R. Downing, N. R. Cheemarla, A. L. Wyllie, C. C.  
371 Kalinich, I. M. Ott, J. Quick, N. J. Loman, K. M. Neugebauer, A. L. Greninger, K. R. Jerome, P.  
372 Roychoudhury, H. Xie, L. Shrestha, M.-L. Huang, V. E. Pitzer, A. Iwasaki, S. B. Omer, K. Khan, I.  
373 I. Bogoch, R. A. Martinello, E. F. Foxman, M. L. Landry, R. A. Neher, A. I. Ko, N. D. Grubaugh,  
374 Coast-to-Coast Spread of SARS-CoV-2 during the Early Epidemic in the United States. *Cell*  
375 (2020), doi:10.1016/j.cell.2020.04.021.
- 376 31. D. D. S. Candido, A. Watts, L. Abade, M. U. G. Kraemer, O. G. Pybus, J. Croda, W. de Oliveira, K.  
377 Khan, E. C. Sabino, N. R. Faria, Routes for COVID-19 importation in Brazil. *J. Travel Med.* **27**  
378 (2020), doi:10.1093/jtm/taaa042.
- 379 32. G. Dudas, T. Bedford, The ability of single genes vs full genomes to resolve time and space in

- 380 outbreak analysis. *BMC Evol. Biol.* **19** (2019), doi:10.1186/s12862-019-1567-0.
- 381 33. WHO, Guidance for surveillance of SARS-CoV-2 variants: Interim guidance, 9 August 2021. *WHO*  
382 (2021), (available at [https://www.who.int/publications/i/item/WHO\\_2019-](https://www.who.int/publications/i/item/WHO_2019-)  
383 [nCoV\\_surveillance\\_variants](https://www.who.int/publications/i/item/WHO_2019-nCoV_surveillance_variants)).
- 384 34. UN, Department of Economic and Social Affairs, Population Division (2019). World Population  
385 Prospects 2019, Online Edition. Rev. 1. *United Nations, Department of Economic and Social*  
386 *Affairs, Population Division (2019). World Population Prospects 2019, Online Edition. Rev. 1.*  
387 (2019).
- 388 35. World Bank, World bank country and lending groups – world bank data help desk. *The World Bank*  
389 (2021), (available at [https://datahelpdesk.worldbank.org/knowledgebase/articles/906519-world-](https://datahelpdesk.worldbank.org/knowledgebase/articles/906519-world-bank-country-and-lending-groups)  
390 [bank-country-and-lending-groups](https://datahelpdesk.worldbank.org/knowledgebase/articles/906519-world-bank-country-and-lending-groups)).
- 391 36. IHME, Global Burden of Disease Collaborative Network. Global Burden of Disease Study 2019  
392 (GBD 2019) Covariates 1980-2019. *Institute for Health Metrics and Evaluation (IHME)* (2020),  
393 (available at [http://ghdx.healthdata.org/record/global-burden-disease-study-2019-gbd-2019-](http://ghdx.healthdata.org/record/global-burden-disease-study-2019-gbd-2019-covariates-1980-2019)  
394 [covariates-1980-2019](http://ghdx.healthdata.org/record/global-burden-disease-study-2019-gbd-2019-covariates-1980-2019)).
- 395 37. IHME, Institute for Health Metrics and Evaluation (IHME). Gross Domestic Product (GDP)  
396 Estimates by Country 1950-2015. *Institute for Health Metrics and Evaluation (IHME)* (2012),  
397 (available at [http://ghdx.healthdata.org/record/ihme-data/gross-domestic-product-gdp-estimates-](http://ghdx.healthdata.org/record/ihme-data/gross-domestic-product-gdp-estimates-country-1950-2015)  
398 [country-1950-2015](http://ghdx.healthdata.org/record/ihme-data/gross-domestic-product-gdp-estimates-country-1950-2015)).
- 399 38. UNESCO, UNESCO Institute for Statistics. *UNESCO* (2021), (available at  
400 [http://data.uis.unesco.org/Index.aspx?DataSetCode=SCN\\_DS&lang=en](http://data.uis.unesco.org/Index.aspx?DataSetCode=SCN_DS&lang=en)).
- 401 39. Y. Shu, J. McCauley, GISAID: Global initiative on sharing all influenza data – from vision to reality.  
402 *Euro Surveill.* **22** (2017), doi:10.2807/1560-7917.es.2017.22.13.30494.
- 403 40. A. E. Magurran, *Measuring Biological Diversity* (John Wiley & Sons, 2013).
- 404 41. T. Y. Michaelsen, M. Bennedbaek, L. E. Christiansen, M. S. F. Jorgensen, C. H. Moller, E. A.  
405 Sorensen, S. Knutsson, J. Brandt, T. B. N. Jensen, C. Chiche-Lapierre, Others, Introduction and  
406 transmission of SARS-CoV-2 B. 1.1. 7 in Denmark. *medRxiv* (2021) (available at  
407 <https://www.medrxiv.org/content/10.1101/2021.06.04.21258333v1.abstract>).

408

## 409 **Acknowledgements**

410 We gratefully acknowledge the authors from the Originating laboratories responsible for obtaining the  
411 specimens, as well as the Submitting laboratories where the genomic data were generated and shared  
412 via GISAID, on which this research is based. An acknowledgement table can be found in Table S5. GD  
413 acknowledges Joshua Batson, whose work shared on Twitter (@thebasepoint) inspired the creation of  
414 Figure 4E.

415

## 416 **Funding**

417 Internal Fondsen KU Leuven/Internal Funds KU Leuven, Grant No. C14/18/094 (GB)  
418 Research Foundation – Flanders, “Fonds voor Wetenschappelijk Onderzoek - Vlaanderen” G0E1420N,  
419 (GB)  
420 Research Foundation – Flanders, “Fonds voor Wetenschappelijk Onderzoek - Vlaanderen”, G098321N  
421 (GB)  
422 National Institutes of Health F31 AI154824 (GWH, MAS)  
423 National Institutes of Health R01 AI153044 (MAS)  
424 National Institutes of Health U19 AI135995 (MAS)  
425 Oxford Martin School, EUH2020 project MOOD (MUGK)  
426 Branco Weiss Fellowship (MUGK)  
427 Rockefeller Foundation (MUGK)  
428 [Google.org](https://www.google.org) (MUGK)  
429 Fast Grant from Emergent Ventures at the Mercatus Center at George Mason University (NDG)  
430 Centers for Disease Control and Prevention (CDC) Contract # 75D30120C09570 (NDG)  
431 Oxford Martin School (OGP)  
432 Wellcome Trust (NRF)  
433 Royal Society Sir Henry Dale Fellowship 204311/Z/16/Z (NRF)  
434 Medical Research Council-São Paulo Research Foundation (FAPESP) CADDE partnership award  
435 (MR/S0195/1 and FAPESP 18/14389-0) (<http://caddecentre.org/>) (NRF)

436

## 437 **Author Contributions**

438 Conceptualization: AFB, NDG, NRF; Data curation: Danish Covid-19 Genome Consortium; Formal  
439 analysis: AFB, ES, GD, GWH, CCK, SB, SF, MAS, GB; Validation: AFB, ES, GD, GWH, MUGK, SCH,  
440 OGP, CD, SB, SF, NDG, GB, NRF; Methodology: AFB, GD, ES. Visualization: AFB, GD, ES. Writing  
441 – original draft: AFB, ES, GD, CCK, GB, NRF; Writing – review & editing: AFB, ES, GD, GWH, MUGK,  
442 SCH, ECS, OGP, CD, MAS, NDG, GB, NRF; Funding acquisition: NDG.

443

## 444 **Conflicts of Interest**

445 NDG is an infectious diseases consultant for Tempus Labs. MAS receives grants and contracts from the  
446 National Institutes of Health, the US Food & Drug Administration, the US Department of Veterans Affairs  
447 and Janssen Research & Development. OGP has undertaken work for AstraZeneca on SARS-CoV-2  
448 classification and genetic lineage nomenclature.

449

450

## 451 **Data and materials availability**

452 Data used in this study can be found in this GitHub repository:  
453 [https://github.com/andersonbrito/paper\\_2021\\_metasurveillance](https://github.com/andersonbrito/paper_2021_metasurveillance)
